# Supplementary material for: Predicting band gaps of ABN3 perovskites: an account from machine learning and first-principle DFT studies
Source: Royal Society of Chemistry journal article supplement (doi:10.1039/d4ra00402g), 2024-01-01
Supplement: d4ra00402g1.pdf [file d4ra00402g1.pdf]

**Electronic Supplementary Information (ESI)**

**Predicting Band Gaps of  $ABN_3$  Perovskites: An Account from Machine Learning and First-Principle DFT Studies**

**Swarup Ghosh and Joydeep Chowdhury\***

**Affiliation**

Department of Physics, Jadavpur University, 188, Raja S.C. Mallick Road, Kolkata  
700032, India

**\*Corresponding Author:** joydeep72\_c@rediffmail.com /

joydeep.chowdhury@jadavpuruniversity.in

**Table S1.** List of 117 features in predicting band gaps of ABN<sub>3</sub> perovskite compounds.

|                                                                                        |                                                                               |                                                                               |
|----------------------------------------------------------------------------------------|-------------------------------------------------------------------------------|-------------------------------------------------------------------------------|
| Mendelev number<br>min/ max/ range/ mean/<br>avg_dev/ mode                             | Atomic weight<br>min/ max/ range/ mean/<br>avg_dev/ mode                      | Melting temperature<br>min/ max/ range/ mean/<br>avg_dev/ mode                |
| Covalent radius<br>min/ max/ range/ mean/<br>avg_dev/ mode                             | Electronegativity<br>min/ max/ range/ mean/<br>avg_dev/ mode                  | s valence electrons<br>min/ max/ range/ mean/<br>avg_dev/ mode                |
| p valence electrons<br>min/ max/ range/ mean/<br>avg_dev/ mode                         | d valence electrons<br>min/ max/ range/ mean/<br>avg_dev/ mode                | f valence electrons<br>min/ max/ range/ mean/<br>avg_dev/ mode                |
| Total valence electrons<br>min/ max/ range/ mean/<br>avg_dev/ mode                     | Unfilled s states<br>min/ max/ range/ mean/<br>avg_dev/ mode                  | Unfilled p states<br>min/ max/ range/ mean/<br>avg_dev/ mode                  |
| Unfilled d states<br>min/ max/ range/ mean/<br>avg_dev/ mode                           | Unfilled f states<br>min/ max/ range/ mean/<br>avg_dev/ mode                  | Total unfilled states<br>min/ max/ range/ mean/<br>avg_dev/ mode              |
| Specific volume per atom<br>of ground state<br>min/ max/ range/ mean/<br>avg_dev/ mode | Band gap energy of ground<br>state<br>min/ max/ range/ mean/<br>avg_dev/ mode | Magnetic moment of<br>ground state<br>min/ max/ range/ mean/<br>avg_dev/ mode |
| Space group number<br>min/ max/ range/ mean/<br>avg_dev/ mode                          | Ionic character<br>max/ mean                                                  | Formation energy                                                              |

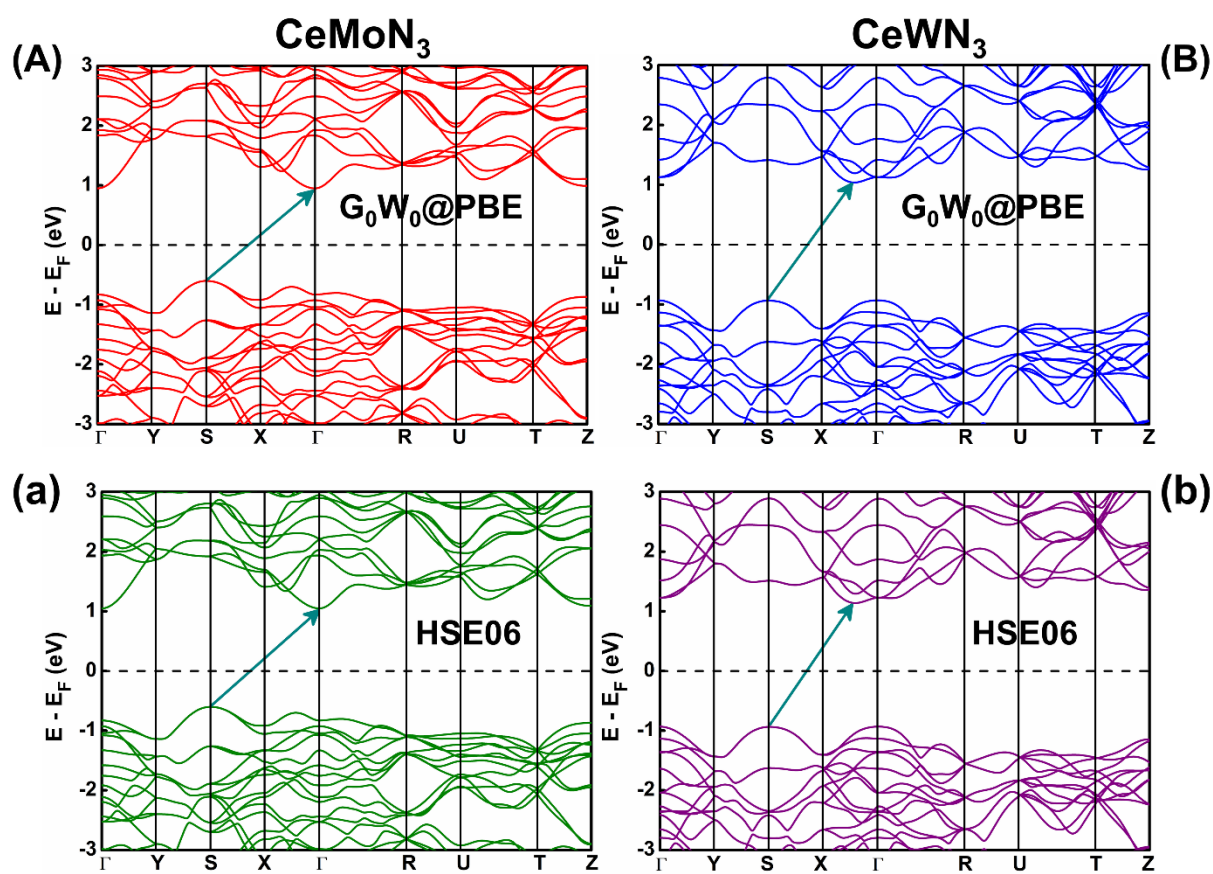

**Fig. S1.** E-k diagrams of  $CeMoN_3$  (left panel) and  $CeWN_3$  (right panel) compounds along  $\Gamma \rightarrow Y \rightarrow S \rightarrow X \rightarrow \Gamma \rightarrow R \rightarrow U \rightarrow T \rightarrow Z$  high-symmetry direction as obtained from  $G_0W_0@PBE$  and HSE06 level of theories [Horizontal dashed line and inclined arrow represent Fermi energy level and band gap, respectively].
